# Supplementary material for: Long-term outcomes of pouch surveillance and risk of neoplasia in familial adenomatous polyposis
Source: PubMed Central journal article supplement — Endoscopy. 2023 May 22;55(9):836–46. doi: 10.1055/a-2038-0541 (PMC10465241; doi:10.1055/a-2038-0541), 2023-05-22
Supplement: 21802supmat_10-1055-a-2038-0541.pdf [file 21802supmat_10-1055-a-2038-0541.pdf]

## Supplementary material

**Long-term outcomes of pouch surveillance and risk of neoplasia in familial adenomatous polyposis**

Roshani V Patel, Kit Curtius, Ripple Mann, Jordan Fletcher, Vicky Cuthill, Susan K Clark, Alexander C von Roon, Andrew Latchford

**Table 1s:** Differences in surveillance between patients who had a primary pouch (RPC) versus those who had a secondary pouch RPC. Medians, ranges, and interquartile ranges (IQR) provided for each variable. P-values derived from Mann Whitney U-tests.

|                                        | All of follow-up                                    |                                                    |         |
|----------------------------------------|-----------------------------------------------------|----------------------------------------------------|---------|
|                                        | Primary RPC<br>(n=164)                              | Secondary RPC (n=85)                               | P value |
| Number of surveillance exams           | 7 (range 1-24, IQR = [4,12])                        | 11 (range 1-26, IQR= [5,16])                       | 0.001   |
| Mean surveillance interval             | 1.54 years (range 0.14 – 15.93, IQR = [1.19- 2.46]) | 1.32 years (range 0.52 – 5.75, IQR = [1.09-1.81])  | 0.019   |
| Patient age at first surveillance exam | 34 years (range 6 - 77, IQR = [25-43])              | 40 years (range 17-71, IQR = [34-48])              | 1.2e-05 |
| Pouch age at first surveillance exam   | 3.84 years (range 0.14 -30.85, IQR = [1.41-10.34])  | 2.81 years (range 0.55-18.38, IQR = [1.26-8.08])   | 0.363   |
| Patient age at last surveillance exam  | 43 years (range 10-81, IQR=[32-52])                 | 53 years (range 25-83, IQR = [44-61])              | 8.2e-08 |
| Pouch age at last surveillance exam    | 14.41 years (range 0.14-37.31, IQR = [8.27-21.33])  | 17.07 years (range 0.76-34.56, IQR = [9.79-22.26]) | 0.196   |

**Figure 1s: Surveillance outcomes and overlap in pouch body and cuff.**

## Supplementary material

- A) Kaplan-Meier curve for progression to first adenoma in pouch body. Median survival (dotted line) was 10.4 years (95% CI [9.6–11.0])
- B) Kaplan-Meier curve for progression to first adenoma in cuff. Median survival (dotted line) was 11.4 years (95% CI [10.1–13.4]) since pouch surgery (pouch age).
- C) Venn diagram showing that most patients develop pouch body adenomas also develop cuff adenomas
- D) Venn diagram to show that advanced lesions seem to occur as separate phenomena in patients (with an overlap of only 12 patients)

1A s

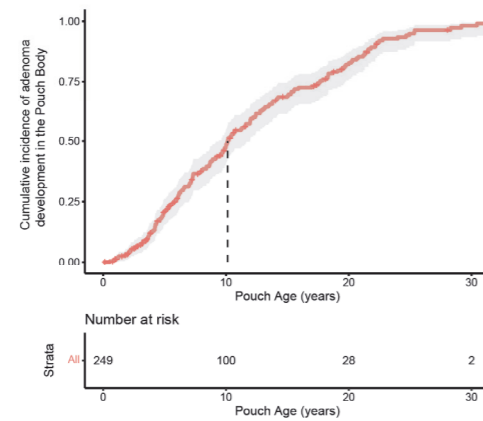

1B s

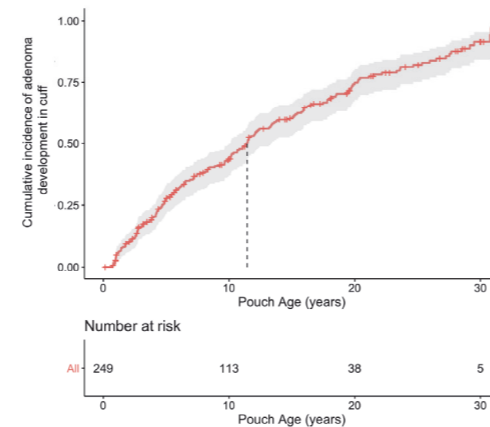

1C s

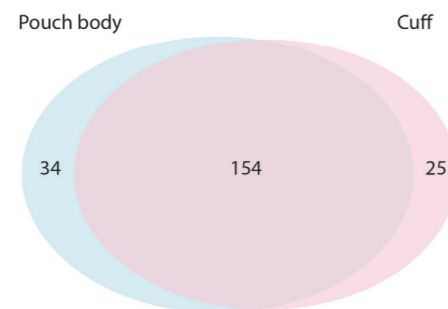

1D s

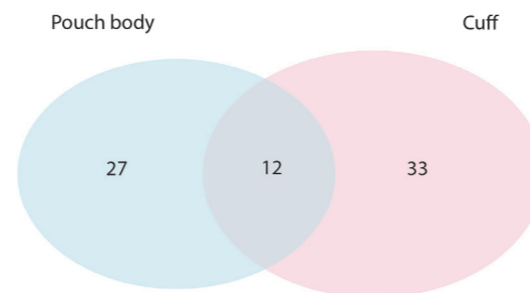

## Supplementary material

**Table 2s:** Development of any adenoma or advanced lesion in the pouch body.**Univariate analyses for progression to any adenoma and advanced lesion (defined by size =>10mm or HGD/ cancer) from baseline pouch surgery**

- Risk factors for progression to any adenoma (UNIVARIATE Cox regression analysis – 188/249 progress to an any adenoma [AA])
- Risk factors for progression to an advanced lesion (UNIVARIATE Cox regression analysis – 39/249 progress to an advanced lesion [AL])

Statistical significance in univariate analyses required  $p < 0.01$  by either a pragmatic approach or with Bonferroni multiple testing correction considering 5 potential variables. One time-varying covariate (TVC) for Spigelman score analysed (128/249 AA and 32/249 AL progressors included with Spigelman stage recorded before AL or censoring). MCR = Mutation cluster region.

**Multivariate analyses for progression to an advanced lesion (AL) from baseline pouch surgery**

- Risk factors for progression to >1cm size adenoma *and/or* HGD/CRC (MULTIVARIATE Cox regression analysis – 39/249 AL)
- Risk factors for progression to >1cm size adenoma *and/or* HGD/CRC for patients with Spigelman stage (MULTIVARIATE with TVC– 32/207 AL)

| Variable                                      | Any adenoma     |                       |       | Advanced Lesion |                       |         |                |                                |         |                       |                                |         |
|-----------------------------------------------|-----------------|-----------------------|-------|-----------------|-----------------------|---------|----------------|--------------------------------|---------|-----------------------|--------------------------------|---------|
|                                               | Univariate      |                       |       | Univariate      |                       |         | Multivariate   |                                |         | Multivariate with TVC |                                |         |
|                                               | Number          | Hazard ratio (95% CI) | P     | Number (n=249)  | Hazard ratio (95% CI) | P value | Number (n=249) | Adjusted Hazard ratio (95% CI) | P value | Number (n=207)        | Adjusted Hazard ratio (95% CI) | P value |
| Female sex                                    | 118 / 249       | 0.8 (0.6 – 1.1)       | 0.133 | 118 / 249       | 0.6 (0.3 – 1.1)       | 0.119   | 118 / 249      | 0.6 (0.3 – 1.3)                | 0.190   | 94/ 207               | 0.7 (0.3 – 1.6)                | 0.470   |
| Age at pouch surgery (years)                  | (n=249)         | 1.01 (1.001-1.027)    | 0.033 | (n=249)         | 1.0 (0.99-1.1)        | 0.176   | (n = 249)      | 1.0 (0.97 – 1.04)              | 0.860   | (n = 207)             | 1.0 (0.97 – 1.04)              | 0.793   |
| APC mutation type                             | (n = 249)       |                       |       | (n = 249)       |                       |         | (n = 249)      |                                |         | (n = 207)             |                                |         |
| - 1250 – 1450 (MCR)                           | 69              | 1                     | ref   | 69              | 1                     | ref     | 69             | 1                              | ref     | 54                    | 1                              | ref     |
| - 1 – 1249                                    | 152             | 1.1 (0.8 – 1.5)       | 0.663 | 152             | 1.5 (0.7 – 3.3)       | 0.315   | 152            | 1.5 (0.7 – 3.5)                | 0.320   | 135                   | 1.4 (0.6 – 3.1)                | 0.486   |
| - > 1450                                      | 20              | 1.5 (0.9 – 2.7)       | 0.138 | 20              | 4.3 (1.4-13.5)        | 0.013   | 20             | 4.4 (1.3 – 15.3)               | 0.019   | 14                    | 0.7 (0.1 – 6.1)                | 0.741   |
| - Gross deletion                              | 8               | 0.9 (0.4 – 2.2)       | 0.873 | 8               | -                     | 1.0     | 8              | -                              | 1.0     | 4                     | -                              | 0.997   |
| Type of initial pouch surgery                 | (n = 249)       |                       |       | (n = 249)       |                       |         | (n = 249)      |                                |         | (n = 207)             |                                |         |
| - IRA (secondary RPC)                         | 85              | 1                     | ref   | 85              | 1                     | ref     | 85             | 1                              | ref     | 80                    | 1                              | ref     |
| - Primary RPC                                 | 164             | 0.9 (0.7 – 1.2)       | 0.522 | 164             | 0.8 (0.4 – 1.5)       | 0.516   | 164            | 0.7 (0.3 – 1.3)                | 0.256   | 127                   | 0.9 (0.4 – 2.0)                | 0.864   |
| Baseline Spigelman stage                      | (n = 80; 57 AA) |                       |       | (n = 80; 11 AL) |                       |         |                |                                |         |                       |                                |         |
| - 0                                           | 13              | 1                     | ref   | 13              | 1                     | ref     |                |                                |         |                       |                                |         |
| - 1                                           | 20              | 0.9 (0.4 – 2.0)       | 0.719 | 20              | 0.4 (0.0 – 5.9)       | 0.475   |                |                                |         |                       |                                |         |
| - 2                                           | 29              | 1.3 (0.6 – 2.9)       | 0.572 | 29              | 2.1 (0.2 – 17.3)      | 0.498   |                |                                |         |                       |                                |         |
| - 3+                                          | 18              | 0.9 (0.4 – 2.3)       | 0.853 | 18              | 1.2 (0.1 – 13.2)      | 0.892   |                |                                |         |                       |                                |         |
| Spigelman stage (time-varying covariate; max) | (128 AA)        |                       |       | (32 AL)         |                       |         |                |                                |         | (32 AL)               |                                |         |
| - 0                                           |                 | 1                     | ref   |                 | 1                     | ref     |                |                                |         |                       | 1                              | ref     |
| - 1                                           |                 | 1.4 (0.7 – 2.8)       | 0.365 |                 | 1.0 (0.2 – 6.3)       | 0.969   |                |                                |         |                       | 1.1 (0.2 – 6.8)                | 0.925   |
| - 2                                           |                 | 1.6 (0.8 – 2.9)       | 0.161 |                 | 1.0 (0.2 – 4.7)       | 0.995   |                |                                |         |                       | 0.9 (0.2 – 4.5)                | 0.929   |
| - 3+                                          |                 | 1.9 (1.01 – 3.6)      | 0.048 |                 | 1.9 (0.4 – 8.4)       | 0.395   |                |                                |         |                       | 1.7 (0.4 – 8.0)                | 0.490   |

## Supplementary material

**Table 3s:** Development of adenoma and advanced lesion in cuff.**Univariate analysis for progression to any adenoma and advanced lesion in the cuff from baseline pouch surgery**

- Risk factors for progression to any adenoma detected (UNIVARIATE Cox regression analysis – 179/249 progress to an adenoma [AA])
- Risk factors for progression to >1cm size adenoma *and/or* HGD/CRC (UNIVARIATE Cox regression analysis – 45/249 progressed to advanced lesion [AL]).

Statistical significance in univariate analyses required  $p < 0.01$  by either a pragmatic approach or with Bonferroni multiple testing correction considering 5 potential variables (denoted by red values). MCR = Mutation cluster region.

**Multivariate analysis for progression to advanced lesion in the cuff from baseline pouch surgery**

- Risk factors for progression to >1cm size adenoma *and/or* HGD/CRC (MULTIVARIATE Cox regression analysis – 19/151 AL)

| Variable                      | Any Adenoma       |                       |                  | Advanced Lesion  |                       |              |                  |                                |              |
|-------------------------------|-------------------|-----------------------|------------------|------------------|-----------------------|--------------|------------------|--------------------------------|--------------|
|                               | Univariate        |                       |                  | Univariate       |                       |              | Multivariate     |                                |              |
|                               | Number (n=249)    | Hazard ratio (95% CI) | P value          | Number (n=249)   | Hazard ratio (95% CI) | P value      | Number (n=151)   | Adjusted Hazard ratio (95% CI) | P value      |
| Female sex                    | 118 / 249         | 0.8 (0.6 – 1.1)       | 0.105            | 118 / 249        | 0.8 (0.4 – 1.5)       | 0.478        | 66 / 151         | 0.7 (0.3 – 2.0)                | 0.511        |
| Age at pouch surgery (years)  | (n=249)           | 1.01 (0.99-1.02)      | 0.137            | (n = 249)        | 1.01 (0.99 – 1.04)    | 0.245        | (n = 151)        | 1.06 (1.01 – 1.11)             | 0.026        |
| APC pathogenic variant type   | (n = 249)         |                       |                  | (n = 249)        |                       |              | (n = 151)        |                                |              |
| - 1250 – 1450 (MCR)           | 69                | 1                     | ref              | 69               | 1                     | ref          | 43               | 1                              | ref          |
| - 1 – 1249                    | 152               | 1.3 (0.9-1.8)         | 0.144            | 152              | 1.6 (0.7 – 3.6)       | 0.234        | 94               | 1.0 (0.3 – 3.2)                | 0.994        |
| - >1450                       | 20                | 2.1 (1.2-3.6)         | 0.010            | 20               | 5.2 (1.9 – 14.2)      | <b>0.001</b> | 8                | 1.0 (0.1 – 8.0)                | 0.967        |
| - Gross deletion              | 8                 | 0.9 (0.4-2.1)         | 0.827            | 8                | 1.7 (0.4 – 8.2)       | 0.493        | 6                | -                              | 0.998        |
| Type of initial pouch surgery | (n = 249)         |                       |                  | (n = 249)        |                       |              | (n = 151)        |                                |              |
| - IRA (secondary RPC)         | 85                | 1                     | ref              | 85               | 1                     | ref          | 60               | 1                              | ref          |
| - Primary RPC                 | 164               | 1.1 (0.8-1.5)         | 0.586            | 164              | 1.2 (0.7-2.3)         | 0.506        | 91               | 0.7 (0.3-2.2)                  | 0.589        |
| Type of anastomosis           | (n = 151; 108 AA) |                       |                  | (n = 151; 19 AL) |                       |              | (n = 151; 19 AL) |                                |              |
| - Handsewn                    | 72                | 1                     | ref              | 72               | 1                     |              | 72               | 1                              | ref          |
| - Stapled                     | 79                | 3.5 (2.3-5.2)         | <b>&lt;0.001</b> | 79               | 4.5 (1.7 – 11.9)      | <b>0.002</b> | 79               | 5.9 (2.0 – 17.1)               | <b>0.001</b> |

## Supplementary material

**Table 4s:** Clinical characteristics of cases of high grade dysplasia and cancer in pouch

| Patient age at RPC | Gender | Diagnosis                  | Genotype                                   | Anastomosis | Shape   | Year of pouch surgery | Pouch age at start of surveillance | Pouch age at 10mm lesion                                        | Location   | Pouch age at HGD/cancer diagnosis | Year of HGD/Cancer Diagnosis | Interval from last benign examination (months)                                | Symptoms                                                     | Mode of diagnosis              | Management                                                         | Histopathology                                                                   | Chemo/rad                | Survival  |
|--------------------|--------|----------------------------|--------------------------------------------|-------------|---------|-----------------------|------------------------------------|-----------------------------------------------------------------|------------|-----------------------------------|------------------------------|-------------------------------------------------------------------------------|--------------------------------------------------------------|--------------------------------|--------------------------------------------------------------------|----------------------------------------------------------------------------------|--------------------------|-----------|
| 42                 | Male   | FAP                        | codon 1132; sequence 3394 G > T            | Handsewn    | J       | 1995                  | 5y10m                              | 5y10m                                                           | Cuff       | 7y11m                             | 2003                         | 7                                                                             | No                                                           | Histopathology                 | EUA and surgical excision of cuff lesion                           | HGD                                                                              | N/A                      |           |
|                    |        |                            |                                            |             |         |                       |                                    |                                                                 | Cuff       | 19y7m                             | 2015                         | 4 (decision to proceed to surgery due to circumferential adenoma)             | No                                                           | Histopathology PE specimen     | APE                                                                | Moderately differentiated adenocarcinoma; pT3 N0 (0/27) V0 MX R1                 | Nil                      | Alive     |
| 17                 | Female | FAP                        | codon 452; sequence 1355 ins GT            | Handsewn    | J       | 1988                  | 11y1m                              | 21y7m                                                           | Cuff       | 30y3m                             | 2018                         | 7 (decision made to proceed to surgery due to circumferential lesion at cuff) | No - PE for large cuff polyp. Polyp cancer found on specimen | Histopathology PE specimen     | APE                                                                | Moderately differentiated mucinous adenocarcinoma; pT1 N0 (0/23) MX V0 L0 Pn0 R0 | Nil                      | Alive     |
| 23                 | Male   | FAP                        | codon 1309; sequence 3927 - 3931 del AAAGA | Unknown     | Unknown | 2003                  | 7y5m                               | 7y5m                                                            | Cuff       | 11y7m                             | 2015                         | 11                                                                            | No                                                           | At surveillance                | Exenteration                                                       | Moderately differentiated adenocarcinoma; ypT2 N0 (0/13) V0 R0                   | Neoadjuvant chemotherapy | Alive     |
| 11                 | Female | FAP                        | codon 1491; sequence 4473 del T            | Handsewn    | Unknown | 1992                  | 19y6m                              | 19y10m                                                          | Cuff       | 20y4m                             | 2012                         | 3 (decision made to proceed to PE due to circumferential lesion at cuff)      | No                                                           | Histopathology PE specimen     | APE                                                                | HGD                                                                              | NA                       | Alive     |
| 22                 | Female | FAP & Crohn's disease      | codon 554; sequence 1660 C > T             | Stapled     | Unknown | 1987                  | 30y10m                             | N/A as patient diagnosed with cuff cancer at index surveillance | Cuff       | 30y10m                            | 2018                         | No prior surveillance                                                         | Bleeding and anal pain                                       | Diagnosed at index pouchoscopy | Exenteration                                                       | Moderately differentiated adenocarcinoma; T2 N0 Pn1 V0 R0                        | Neoadjuvant chemotherapy | Alive     |
| 24                 | Male   | FAP and Ulcerative colitis | codon 1122; sequence 3366 - 3369 del TCAA  | Unknown     | Unknown | 1984                  | 30y5m                              | 30y5m                                                           | Pouch body | 34y5m                             | 2018                         | 6 (called back as had poor bowel preparation)                                 | No                                                           | At surveillance                | No surgery; palliative care as presented with extensive metastasis | Nil                                                                              | Nil                      | 12 months |

\*APE = abdominoperineal excision, y= years, m= months, PE = pouch excision

## Supplementary material

**Table 5s:** Differences in surveillance between patients who progressed to advanced lesions ('progressors') and patients who did not progress to an advanced lesion ('non-progressors') during follow-up in the pouch body or cuff. For patients who developed an advanced lesion (AL), surveillance data is included until date of development of an advanced lesion. Medians, ranges, and interquartile ranges (IQR) provided for each variable. P-values derived from Mann Whitney U-tests.

|                                        | Pouch body                                         |                                                    |         | Cuff                                               |                                                    |         |
|----------------------------------------|----------------------------------------------------|----------------------------------------------------|---------|----------------------------------------------------|----------------------------------------------------|---------|
|                                        | Non-progressors (n=210)                            | Progressors to AL (n=39)                           | P value | Non-progressors (n=204)                            | Progressors to AL (n=45)                           | P value |
| Number of surveillance exams           | 7 (range 1-25, IQR = [4,13])                       | 8 (range 1-23, IQR= [2,13])                        | 0.785   | 8 (range 1-21, IQR =[4-13])                        | 4 (range 1-17, IQR = [2,9])                        | 0.002   |
| Mean surveillance interval             | 1.46 years (range 0.14 – 16, IQR = [1.26-5.39])    | 1.96 years (range 0.66 – 30.44, IQR = [1.29-5.39]) | 0.006   | 1.5 years (range 0.14-10.56, IQR = [1.16-2.24])    | 1.97 years (range = 0.72-30.85, IQR = 1.23-6.12)   | 0.008   |
| Patient age at first surveillance exam | 35 years (range 6 - 77, IQR = [27-45])             | 40 years (range 18-61, IQR = [33-48])              | 0.039   | 35 years (range 6 - 77, IQR = [27-45])             | 40 years (range 18-61, IQR = [33-48])              | 0.039   |
| Pouch age at first surveillance exam   | 2.73 years (range 0.14 -30.85, IQR = [1.24-8.16])  | 8.54 years (range 0.92-30.44, IQR = [3.93-12.24])  | 7.9e-05 | 2.73 years (range 0.14 -30.85, IQR = [1.24-8.16])  | 8.54 years (range 0.92-30.44, IQR = [3.93-12.24])  | 7.9e-05 |
| Patient age at last surveillance exam  | 45 years (range 10-83, IQR=[34-55])                | 48 years (range 26-76, IQR = [40-57])              | 0.173   | 45 years (range 10-81, IQR = [34-55])              | 42 years (range 22-80, IQR =[36-53])               | 0.657   |
| Pouch age at last surveillance exam    | 14.15 years (range 0.14-34.63, IQR = [6.88-19.66]) | 15.9 years (range 0.92-33.72, IQR = [12.33-22.16]) | 0.025   | 14.53 years (range 0.14-37.31, IQR = [7.12-21.45]) | 11.89 years (range 0.97-34.45, IQR = [8.06-19.73]) | 0.668   |

## Supplementary material

**Table 6s:** Clinical details of ten patients who had pouch excision for benign neoplasia.

| #  | Sex | RPC        |             |                   | Pouch Excision |                                                                                              | Histopathology from pouch excision   |                                         |                                           |                                |                               |                            | Survival     |                            |                       |
|----|-----|------------|-------------|-------------------|----------------|----------------------------------------------------------------------------------------------|--------------------------------------|-----------------------------------------|-------------------------------------------|--------------------------------|-------------------------------|----------------------------|--------------|----------------------------|-----------------------|
|    |     | Age at RPC | Anastomosis | Primary histology | Patient age    | Indication                                                                                   | Number of pouch body polyps          | Number of cuff polyps                   | Greatest size of adenoma in pouch body mm | Greatest size of polyp in cuff | Greatest histology pouch body | Greatest histology in cuff | Age at death | Cause of death             | Age at last follow-up |
| 1  | M   | 32         | unknown     | malignancy        | 46             | adenoma burden in cuff and pouch body, 666 adenomas in pouch                                 | 666                                  | unknown                                 | 7                                         | unknown                        | LGD                           | LGD                        | 55           | metastatic gastric cancer  | RIP                   |
| 2  | M   | 43         | stapled     | benign            | 59             | increasing and concerning development of adenomas both within the cuff and body of the pouch | the entire pouch covered in adenomas | the entire pouch is covered in adenomas | 10                                        | unknown                        | LGD                           | LGD                        | 61           | metastatic gastric cancer  | RIP                   |
| 3  | M   | 38         | handsewn    | malignancy        | 56             | high adenoma burden in pouch body                                                            | 330                                  | 0                                       | 3                                         | NA                             | LGD                           | NA                         | 64           | metastatic duodenal cancer | RIP                   |
| 4  | M   | 36         | stapled     | malignancy        | 52             | cuff carpetting (primarily excised for poor function)                                        | scattered adenomas                   | carpetted                               | 7                                         | 6                              | LGD                           | LGD                        | NA           | NA                         | 58                    |
| 5  | M   | 19         | unknown     | unknown           | 40             | adenoma burden in cuff and pouch body                                                        | >100                                 | 1                                       | 30                                        | 12                             | LGD                           | LGD                        | NA           | NA                         | 58                    |
| 6  | M   | 41         | handsewn    | unknown           | 60             | carpetting in pouch body                                                                     | carpetting                           | unknown                                 | 8                                         | unknown                        | LGD                           | NA                         | NA           | NA                         | 61                    |
| 7  | F   | 37         | handsewn    | benign            | 50             | high adenoma burden in pouch body                                                            | 332                                  | 0                                       | 90                                        | NA                             | LGD                           | NA                         | NA           | NA                         | 63                    |
| 8  | M   | 54         | handsewn    | unknown           | 64             | large adenoma in the pouch body                                                              | 11                                   | unknown                                 | 95                                        | 3                              | LGD                           | LGD                        | NA           | NA                         | 67                    |
| 9  | M   | 30         | unknown     | unknown           | 40             | large adenoma in the pouch body                                                              | 68                                   | 15                                      | 30 to 40                                  | 10                             | LGD                           | LGD                        | NA           | NA                         | 48                    |
| 10 | F   | 11         | unknown     | unknown           | 32             | high adenoma burden in pouch body and cuff                                                   | 150                                  | numerous                                | 15                                        | 15                             | LGD                           | HGD                        | NA           | NA                         | 40                    |
